# Supplementary material
Source: ML conference proceedings conference paper supplement (https://openreview.net/forum?id=bGo0A4bJBc)
Supplement: supplementary_material [file attachment]

---

# Cost-Sensitive Self-Training for Optimizing Non-Decomposable Metrics

---

Anonymous Author(s)  
Affiliation

|    |                                                                                             |           |
|----|---------------------------------------------------------------------------------------------|-----------|
| 1  | <b>Contents</b>                                                                             |           |
| 2  | <b>A Limitations and Negative Societal Impacts</b>                                          | <b>2</b>  |
| 3  | A.1 Limitations of our Work . . . . .                                                       | 2         |
| 4  | A.2 Negative Societal Impact . . . . .                                                      | 2         |
| 5  | <b>B Connection between Minimization of Weighted Consistency Regularizer Loss (Eq. (6))</b> |           |
| 6  | <b>and Theoretical Weighted Consistency (<math>R_{\mathcal{B},w}(F)</math> in Sec. 3.4)</b> | <b>2</b>  |
| 7  | <b>C Additional Examples and Proof of Theorem 5</b>                                         | <b>3</b>  |
| 8  | C.1 Examples for Theoretical Assumptions . . . . .                                          | 3         |
| 9  | C.2 Proof of Theorem 5 Assuming a Lemma . . . . .                                           | 4         |
| 10 | C.3 Proof of Lemma 10 . . . . .                                                             | 5         |
| 11 | C.4 Miscellaneous Proofs for Examples . . . . .                                             | 7         |
| 12 | <b>D All-Layer Margin Generalization Bounds</b>                                             | <b>7</b>  |
| 13 | <b>E Proof of Proposition 6</b>                                                             | <b>8</b>  |
| 14 | <b>F Notation</b>                                                                           | <b>9</b>  |
| 15 | <b>G Code, License, Assets and Computation Requirements</b>                                 | <b>9</b>  |
| 16 | G.1 Code and Licenses of Assets . . . . .                                                   | 9         |
| 17 | G.2 Computational Requirements . . . . .                                                    | 9         |
| 18 | <b>H Objective</b>                                                                          | <b>9</b>  |
| 19 | H.1 Logit Adjusted Weighted Consistency Regularizer . . . . .                               | 9         |
| 20 | H.2 CSST(FixMatch) . . . . .                                                                | 11        |
| 21 | H.3 CSST(UDA) . . . . .                                                                     | 12        |
| 22 | <b>I <a href="#">Threshold mechanism for diagonal Gain Matrix</a></b>                       | <b>13</b> |
| 23 | <b>J Dataset</b>                                                                            | <b>13</b> |

|    |                                                                                |           |
|----|--------------------------------------------------------------------------------|-----------|
| 24 | <b>K Algorithms</b>                                                            | <b>13</b> |
| 25 | <b>L Details of Experiments and Hyper-parameters</b>                           | <b>14</b> |
| 26 | <b>M Statistical Analysis</b>                                                  | <b>14</b> |
| 27 | <b>N Additional Details</b>                                                    | <b>15</b> |
| 28 | N.1 Formal Statement Omitted in Sec. 2.2 . . . . .                             | 15        |
| 29 | N.2 Comparison with the $(a, \tilde{c})$ -expansion Property in [14] . . . . . | 15        |
| 30 | N.3 Comparison of the Theoretical Assumptions with that of [14] . . . . .      | 16        |

31 **A Limitations and Negative Societal Impacts**

32 **A.1 Limitations of our Work**

33 At this point we only consider optimizing objectives through CSST which can be written as a linear  
 34 combination of entries of confusion matrix. Although there are important metrics like Recall,  
 35 Coverage etc. which can be expressed as a linear form of confusion matrix. However, there do exist  
 36 important metrics like Intersection over Union (IoU), Q-Mean etc. which we don't consider in the  
 37 current work. We leave this as an open direction for further work.

38 Also in this work we considered datasets where unlabeled data distribution doesn't significantly differ  
 39 from the labeled data distribution, developing robust methods which can also take into account the  
 40 distribution shift between unlabeled and labeled is an interesting direction for future work.

41 **A.2 Negative Societal Impact**

42 Our work has application in fairness domain [3], where it can be used to improve performance of  
 43 minority sub-groups present in data. These fairness objectives can be practically enforced on neural  
 44 networks through the proposed CSST framework. However these same algorithms can be tweaked  
 45 to artificially induce bias in decision making of trained neural networks, for example by ignoring  
 46 performance of models on certain subgroups. Hence, we suggest deployment of these models after  
 47 thorough testing on all sub groups of data.

48 **B Connection between Minimization of Weighted Consistency Regularizer  
 49 Loss (Eq. (6)) and Theoretical Weighted Consistency ( $R_{\mathcal{B},w}(F)$  in Sec. 3.4)**

50 In this section, we show that minimization of weighted consistency regularizer Eq. (6) and that of  
 51 theoretical weighted consistency regularizer  $R_{\mathcal{B},w}(F)$  can be related to CSL.

52 First, we consider  $R_{\mathcal{B},w}(F)$ . Using strong augmentation  $\mathcal{A}$ , (theoretical) weighted consistency  
 53 regularizer  $R_{\mathcal{B},w}(F)$  is approximated as  $R_{\mathcal{B},w}(F) \approx \sum_{i,j \in [K]} w_{ij} \mathbf{E}_{x \sim P_i} [\mathbf{1}(F(\mathcal{A}(x)) \neq F(x))]$ .  
 54 Noting that  $\mathbf{1}(F(\mathcal{A}(x)) \neq F(x)) \leq \mathbf{1}(F(\mathcal{A}(x)) \neq j) + \mathbf{1}(F(x) \neq j)$  for any  $j, x$ , this value is  
 55 bounded as follows:

$$\begin{aligned}
 R_{\mathcal{B},w}(F) &\approx \sum_{i,j \in [K]} w_{ij} \mathbf{E}_{x \sim P_i} [\mathbf{1}(F(\mathcal{A}(x)) \neq F(x))] \\
 &\leq \sum_{i,j \in [K]} w_{ij} \mathbf{E}_{x \sim P_i} [\mathbf{1}(F(\mathcal{A}(x)) \neq j)] + \sum_{i,j \in [K]} w_{ij} \mathbf{E}_{x \sim P_i} [\mathbf{1}(F(x) \neq j)].
 \end{aligned}$$

56 If we focus on samples  $x$  with high confidence in model predictions, then the latter term  
 57  $\sum_{i,j \in [K]} w_{ij} \mathbf{E}_x [\mathbf{1}(F(x) \neq j)]$  is negligible. Therefore, minimization of (an empirical approxima-  
 58 tion of)  $R_{\mathcal{B},w}(F)$  on these samples is approximately equivalent to CSL, i.e., the following problem:  
 59

$$\min_F \sum_{i,j \in [K]} w_{ij} \mathbf{E}_x [\mathbf{1}(F(\mathcal{A}(x)) \neq j)]. \tag{8}$$

60 The above CSL is shown to be calibrated with the loss [9]  $\ell^{\text{wt}}(y, p_m(x))$  (also used in Prop. 7) given  
 61 below:

$$\ell^{\text{wt}}(y, p_m(x)) = - \sum_{i \in [K]} G_{yi} \log(p_m(x)_i).$$

62 Next, we relate Eq. (6) to CSL. If we denote pseudo label  $\hat{p}_m(x)$  by  $y$  in Eq. (6), then we see  
 63 that Eq. (6) is identical to  $\ell^{\text{wt}}(y, p_m(\mathcal{A}(x)))$ . By (the proof of) [8, Proposition 4], by minimizing  
 64  $\ell^{\text{wt}}(y, p_m(\mathcal{A}(x)))$ , we obtain a Bayes optimal classifier  $F(\mathcal{A}(x))$ , where  $F$  is the classifier defined  
 65 by the model  $p_m$ . If  $w$  is the corresponding weight to the gain matrix  $\mathbf{G}$ , then classifier  $F$  gives a  
 66 solution to the CSL (8). Thus, we can relate minimization of weighted consistency regularizer Eq.  
 67 (6) to that of theoretical weighted consistency regularizer  $R_{\mathcal{B},w}(F)$  through the CSL (8).

## 68 C Additional Examples and Proof of Theorem 5

69 In this section, we provide some examples for assumptions introduced in Sec. 3 and a proof of  
 70 Theorem 5. We provide proof of these examples in Sec. C.4.

### 71 C.1 Examples for Theoretical Assumptions

72 The following example (Example 3) shows that the  $c$ -expansion (Definition 2) property is satisfied  
 73 for mixtures of Gaussians and mixtures of manifolds.

74 **EXAMPLE 3.** By [14, Examples 3.4, 3.5], the  $c$ -expansion property is satisfied for mixtures of  
 75 isotropic Gaussian distributions and mixtures of manifolds. More precisely, in the case of mixtures of  
 76 isotropic Gaussian distributions, i.e., if  $Q$  is given as mixtures of  $\mathcal{N}(\tau_i, \frac{1}{d}I_{d \times d})$  for  $i = 1, \dots, n$  with  
 77 some  $n \in \mathbb{Z}_{\geq 1}$  and  $\tau_i \in \mathbb{R}^d$ , and  $\mathcal{B}(x)$  is an  $\ell_2$ -ball with radius  $r$  then by [1, (13)] and [14, Section  
 78 B.2],  $Q$  satisfies the  $c$ -expansion property with  $c(p) = R_h(p)/p$  for  $p > 0$  and  $h = 2r\sqrt{d}$  (c.f., [14,  
 79 section B.2]). Here  $R_h(p) = \Phi(\Phi^{-1}(p) + h)$  and  $\Phi$  is the cumulative distribution function of the  
 80 standard normal distribution on  $\mathbb{R}$ .

81 In Sec. 3.4, we required the assumption that  $\gamma > 3$  (Assumption 4) and remarked that it roughly  
 82 requires  $\text{Err}_w(F_{\text{pl}})$  is “small”. The following example provides explicit conditions for  $\text{Err}_w(F_{\text{pl}})$   
 83 that satisfy the assumption using a toy example.

84 **EXAMPLE 8.** Using a toy example provided in Example 3, we provide conditions that satisfy  
 85 the assumption  $\gamma > 3$  approximately. To explain the assumption  $\gamma > 3$ , we assume that  $\mathcal{P}_w$   
 86 is given as a mixture of isotropic Gaussians and  $\mathcal{B}(x)$  is  $\ell_2$ -ball with radius  $r$  as in Example 3.  
 87 Furthermore, we assume that  $\|w\|_1 = 1$  and  $\text{Err}_w(F^*)$  is sufficiently small compared to  $\text{Err}_w(F_{\text{pl}})$ .  
 88 Then,  $p_w = \text{Err}_w(F_{\text{pl}}) + \text{Err}_w(F^*) \approx \text{Err}_w(F_{\text{pl}})$ . Using this approximation, since  $\mathcal{P}_w$  satisfies the  
 89  $c$ -expansion property with  $c(p) = R_{2r\sqrt{d}}(p)/p$ , if  $r = \frac{1}{2\sqrt{d}}$  then, the condition  $\gamma > 3$  is satisfied  
 90 when  $\text{Err}_w(F_{\text{pl}}) < 0.17$ . If  $r = \frac{3}{2\sqrt{d}}$  then, the condition  $\gamma > 3$  is satisfied when  $\text{Err}_w(F_{\text{pl}}) < 0.33$ .

91 In Assumption 1, we assumed that both of  $\text{Err}_w(F^*)$  and  $R_{\mathcal{B},w}(F^*)$  are small. The following  
 92 example suggests the validity of this assumption.

93 **EXAMPLE 9.** In this example, we assume  $w$  is a diagonal matrix  $\text{diag}(w_1, \dots, w_K)$ . For simplicity,  
 94 we normalize  $w$  so that  $\sum_{i \in [K]} w_i = 1$ . As in [14, Example 3.4], we assume that  $P_i$  is given as  
 95 isotropic Gaussian distribution  $\mathcal{N}(\tau_i, \frac{1}{d}I_{d \times d})$  with  $\tau_i \in \mathbb{R}^d$  for  $i = 1, \dots, K$  and  $\mathcal{B}(x)$  is an  $\ell^2$ -ball  
 96 with radius  $\frac{1}{2\sqrt{d}}$ . Furthermore, we assume  $\inf_{1 \leq i < j \leq K} \|\tau_i - \tau_j\|_2 \gtrsim \frac{\sqrt{\log d}}{\sqrt{d}}$  and  $\sup_{i,j \in [K]} \frac{w_i}{w_j} =$   
 97  $o(d)$ , where the latter assumption is valid for high dimensional datasets (e.g., image datasets). Then it  
 98 can be proved that there exists a classifier  $F$  such that  $R_{\mathcal{B},w}(F) = O(\frac{1}{d^c})$  and  $\text{Err}_w(F) = O(\frac{1}{d^c})$ ,  
 99 where  $c > 0$  is a constant (we can take  $F$  as the Bayes-optimal classifier for  $\text{Err}_w$ ). Thus, this  
 100 suggests that Assumption 1 is valid for datasets with high dimensional instances.

101 The statement of Example 8 follows from numerical computation of  $R_{2r\sqrt{d}}(p)/p$ . We provide proofs  
 102 of Examples 3 and 9 in Sec. C.4.

103 **C.2 Proof of Theorem 5 Assuming a Lemma**

104 Theorem 5 can be deduced from the following lemma (by taking  $H = F^*$  and  $\mathcal{L}_{Q,H}(\widehat{F}) \leq$   
 105  $\mathcal{L}_{Q,H}(F^*)$ ), which provides a similar result to [14, Lemma A.8].

106 **LEMMA 10.** *Let  $H$  be a classifier and  $Q$  a probability measure on  $\mathcal{X}$  satisfying  $c$ -expansion  
 107 property. We put  $\gamma_H = c(Q(\{x \in \mathcal{X} : F_{\text{pl}}(x) \neq H(x)\}))$ . For a classifier  $F$ , we define  $\mathcal{S}_{\mathcal{B}}(F)$  by  
 108  $\mathcal{S}_{\mathcal{B}}(F) = \{x \in \mathcal{X} : F(x) = F(x') \quad \forall x' \in \mathcal{B}(x)\}$ . For a classifier  $F$ , we define  $\mathcal{L}_{Q,H}(F)$  by*

$$\begin{aligned} & \frac{\gamma_H + 1}{\gamma_H - 1} Q(\{x \in \mathcal{X} : F(x) \neq F_{\text{pl}}(x)\}) \\ & + \frac{2\gamma_H}{\gamma_H - 1} Q(\mathcal{S}_{\mathcal{B}}^c(F)) + \frac{2\gamma_H}{\gamma_H - 1} Q(\mathcal{S}_{\mathcal{B}}^c(H)) - Q(\{x \in \mathcal{X} : F_{\text{pl}}(x) \neq H(x)\}), \end{aligned}$$

109 where  $\mathcal{S}_{\mathcal{B}}^c(F)$  denotes the complement of  $\mathcal{S}_{\mathcal{B}}(F)$ . Then, we have  $Q(\{x \in \mathcal{X} : F(x) \neq H(x)\}) \leq$   
 110  $\mathcal{L}_{Q,H}(F)$  for any classifier  $F$ .

111 In this subsection, we provide a proof of Theorem 5 assuming Lemma 10. We provide a proof of the  
 112 lemma in the next subsection. For a classifier  $F$ , we define  $\mathcal{M}(F)$  as  $\{x \in \mathcal{X} : F(x) \neq F^*(x)\}$  and  
 113  $\mathcal{M}_{\text{pl}}(F)$  as  $\{x \in \mathcal{X} : F(x) \neq F_{\text{pl}}(x)\}$ . We define  $\tilde{\mathcal{L}}_w(F)$  by

$$\tilde{\mathcal{L}}_w(F) = \mathcal{L}_w(F) + \frac{2\gamma}{\gamma - 1} R_{\mathcal{B},w}(F^*) - \mathcal{P}_w(\{x \in \mathcal{X} : F_{\text{pl}}(x) \neq F^*(x)\}).$$

114 We note that  $\tilde{\mathcal{L}}_w(F) - \mathcal{L}_w(F)$  does not depend on  $F$ .

115 *Proof of Theorem 5.* We let  $Q = \mathcal{P}_w$  and  $H = F^*$  in Lemma 10 and denote  $\gamma_H$  in the lemma by  $\gamma'$ .  
 116 Since  $w_{ij} \geq 0$  and  $\mathbf{E}_{x \sim P_i} [\mathbf{1}(F_{\text{pl}}(x) \neq F^*(x))] \leq \mathbf{E}_{x \sim P_i} [\mathbf{1}(F_{\text{pl}}(x) \neq j)] + \mathbf{E}_{x \sim P_i} [\mathbf{1}(F^*(x) \neq j)]$   
 117 for any  $i, j$ , we have the following:

$$\begin{aligned} |w|_1 \mathcal{P}_w(\mathcal{M}(F_{\text{pl}})) &= \sum_{i,j \in [K]} w_{ij} \mathbf{E}_{x \sim P_i} [\mathbf{1}(F_{\text{pl}}(x) \neq F^*(x))] \\ &\leq \sum_{i,j \in [K]} w_{ij} \{ \mathbf{E}_{x \sim P_i} [\mathbf{1}(F_{\text{pl}}(x) \neq j)] + \mathbf{E}_{x \sim P_i} [\mathbf{1}(F^*(x) \neq j)] \} \\ &= \text{Err}_w(F_{\text{pl}}) + \text{Err}_w(F^*). \end{aligned}$$

118 Thus, we obtain  $\mathcal{P}_w(\mathcal{M}(F_{\text{pl}})) \leq p_w$ . Because  $c$  is non-increasing, we have  $\gamma \leq \gamma'$ . We note that

$$\begin{aligned} \text{Err}_w(F) &= \sum_{i,j \in [K]} w_{ij} \mathbf{E}_{x \sim P_i} [\mathbf{1}(F(x) \neq j)] \\ &\leq \sum_{i,j \in [K]} w_{ij} \mathbf{E}_{x \sim P_i} [\mathbf{1}(F(x) \neq F^*(x))] + \sum_{i,j \in [K]} w_{ij} \mathbf{E}_{x \sim P_i} [\mathbf{1}(F^*(x) \neq j)] \\ &= |w|_1 \mathcal{P}_w(\mathcal{M}(F)) + \text{Err}_w(F^*). \end{aligned}$$

119 By this inequality and Lemma 10, the error is upper bounded as follows:

$$\begin{aligned} \text{Err}_w(F) &\leq \text{Err}_w(F^*) + \frac{\gamma' + 1}{\gamma' - 1} |w|_1 \mathcal{P}_w(\mathcal{M}_{\text{pl}}(F)) \\ &\quad + \frac{2\gamma'}{\gamma' - 1} |w|_1 \mathcal{P}_w(\mathcal{S}_{\mathcal{B}}^c(F)) + \frac{2\gamma'}{\gamma' - 1} |w|_1 \mathcal{P}_w(\mathcal{S}_{\mathcal{B}}^c(F^*)) - |w|_1 \mathcal{P}_w(\mathcal{M}(F_{\text{pl}})). \end{aligned}$$

120 Since  $\gamma \leq \gamma'$ , we obtain

$$\begin{aligned} \text{Err}_w(F) &\leq \text{Err}_w(F^*) + \frac{\gamma + 1}{\gamma - 1} |w|_1 \mathcal{P}_w(\mathcal{M}_{\text{pl}}(F)) \\ &\quad + \frac{2\gamma}{\gamma - 1} |w|_1 \mathcal{P}_w(\mathcal{S}_{\mathcal{B}}^c(F)) + \frac{2\gamma}{\gamma - 1} |w|_1 \mathcal{P}_w(\mathcal{S}_{\mathcal{B}}^c(F^*)) - |w|_1 \mathcal{P}_w(\mathcal{M}(F_{\text{pl}})). \quad (9) \end{aligned}$$

121 By definition of  $\mathcal{L}_w$  and letting  $F = \widehat{F}$ , we have the following:

$$\begin{aligned}
\text{Err}_w(\widehat{F}) &\leq \text{Err}_w(F^*) + \mathcal{L}_w(\widehat{F}) + \frac{2\gamma}{\gamma-1}R_{\mathcal{B},w}(F^*) - |w|_1\mathcal{P}_w(\{x \in \mathcal{X} : F_{\text{pl}}(x) \neq F^*(x)\}) \\
&\leq \text{Err}_w(F^*) + \mathcal{L}_w(F^*) + \frac{2\gamma}{\gamma-1}R_{\mathcal{B},w}(F^*) - |w|_1\mathcal{P}_w(\{x \in \mathcal{X} : F_{\text{pl}}(x) \neq F^*(x)\}) \\
&= \text{Err}_w(F^*) + \frac{2}{\gamma-1}|w|_1\mathcal{P}_w(\mathcal{M}(F_{\text{pl}})) + \frac{4\gamma}{\gamma-1}R_{\mathcal{B},w}(F^*) \\
&\leq \text{Err}_w(F^*) + \frac{2}{\gamma-1}(\text{Err}_w(F_{\text{pl}}) + \text{Err}_w(F^*)) + \frac{4\gamma}{\gamma-1}R_{\mathcal{B},w}(F^*) \\
&= \frac{2}{\gamma-1}\text{Err}_w(F_{\text{pl}}) + \frac{\gamma+1}{\gamma-1}\text{Err}_w(F^*) + \frac{4\gamma}{\gamma-1}R_{\mathcal{B},w}(F^*).
\end{aligned}$$

122 Here, the second inequality holds since  $\widehat{F}$  is a minimizer of  $\mathcal{L}_w$ , the third inequality follows from  
123  $\mathbb{1}(F^*(x) \neq F_{\text{pl}}(x)) \leq \mathbb{1}(F^*(x) \neq j) + \mathbb{1}(F_{\text{pl}}(x) \neq j)$  for any  $j$ . Thus, we have the assertion of  
124 the theorem.  $\square$

### 125 C.3 Proof of Lemma 10

126 We decompose  $\mathcal{M}(F) \cap \mathcal{S}_{\mathcal{B}}(F) \cap \mathcal{S}_{\mathcal{B}}(H)$  into the following three sets:

$$\begin{aligned}
\mathcal{N}_1 &= \{x \in \mathcal{S}_{\mathcal{B}}(F) \cap \mathcal{S}_{\mathcal{B}}(H) : F(x) = F_{\text{pl}}(x), \text{ and } F_{\text{pl}}(x) \neq H(x)\}, \\
\mathcal{N}_2 &= \{x \in \mathcal{S}_{\mathcal{B}}(F) \cap \mathcal{S}_{\mathcal{B}}(H) : F(x) \neq F_{\text{pl}}(x), F_{\text{pl}}(x) \neq H(x), \text{ and } F(x) \neq H(x)\}, \\
\mathcal{N}_3 &= \{x \in \mathcal{S}_{\mathcal{B}}(F) \cap \mathcal{S}_{\mathcal{B}}(H) : F(x) \neq F_{\text{pl}}(x) \text{ and } F_{\text{pl}}(x) = H(x)\}.
\end{aligned}$$

127 **LEMMA 11.** *Let  $S = \mathcal{S}_{\mathcal{B}}(F) \cap \mathcal{S}_{\mathcal{B}}(H)$  and  $V = \mathcal{M}(F) \cap \mathcal{M}(F_{\text{pl}}) \cap S$ . Then, we have  $\mathcal{N}(V) \cap$   
128  $\mathcal{M}^c(F) \cap S = \emptyset$  and  $\mathcal{N}(V) \cap \mathcal{M}^c(F_{\text{pl}}) \cap S \subseteq \mathcal{M}_{\text{pl}}(F)$ . Here  $\mathcal{M}_{\text{pl}}(F)$  is defined as  $\{x \in \mathcal{X} :$   
129  $F(x) \neq F_{\text{pl}}(x)\}$ .*

130 *Proof.* We take any element  $x$  in  $\mathcal{N}(V) \cap S$ . Since  $x \in \mathcal{N}(V)$  and definition of neighborhoods, there  
131 exists  $x' \in \mathcal{M}(F_{\text{pl}}) \cap \mathcal{M}(F) \cap S$  such that  $\mathcal{B}(x) \cap \mathcal{B}(x') \neq \emptyset$ . Since  $x, x' \in \mathcal{S}_{\mathcal{B}}(F)$ ,  $F$  takes the  
132 same values on  $\mathcal{B}(x)$  and  $\mathcal{B}(x')$ . By  $\mathcal{B}(x) \cap \mathcal{B}(x') \neq \emptyset$ ,  $F$  takes the same value on  $\mathcal{B}(x) \cup \mathcal{B}(x')$ . It  
133 follows that  $F(x) = F(x')$ . Since we have  $x, x' \in \mathcal{S}_{\mathcal{B}}(H)$ , similarly, we see that  $H(x) = H(x')$ . By  
134  $x' \in \mathcal{M}(F)$ , we have  $F(x) = F(x') \neq H(x') = H(x)$ . Thus, we see that  $\mathcal{N}(V) \cap \mathcal{M}^c(F) \cap S = \emptyset$ .  
135 We assume  $x \in \mathcal{N}(V) \cap \mathcal{M}^c(F_{\text{pl}}) \cap S$ . Then, we have  $F(x) \neq H(x)$  and  $F_{\text{pl}}(x) = H(x)$ . Therefore,  
136 we obtain  $F(x) \neq F_{\text{pl}}(x)$ . This completes the proof.  $\square$

137 **LEMMA 12.** *Suppose that assumptions of Lemma 10 hold. We define  $q$  as follows:*

$$q = \frac{Q(\mathcal{M}_{\text{pl}}(F) \cup \mathcal{S}_{\mathcal{B}}^c(F) \cup \mathcal{S}_{\mathcal{B}}^c(H))}{\gamma_H - 1}. \quad (10)$$

138 *Then, we have  $Q(\mathcal{S}_{\mathcal{B}}(F) \cap \mathcal{S}_{\mathcal{B}}(H) \cap \mathcal{M}(F_{\text{pl}}) \cap \mathcal{M}(F)) \leq q$ . In particular, noting that  $\mathcal{N}_1 \cup \mathcal{N}_2 \subseteq$   
139  $\mathcal{S}_{\mathcal{B}}(F) \cap \mathcal{S}_{\mathcal{B}}(H) \cap \mathcal{M}(F_{\text{pl}}) \cap \mathcal{M}(F)$ , we have  $Q(\mathcal{N}_1 \cup \mathcal{N}_2) \leq q$ .*

140 *Proof.* We let  $S = \mathcal{S}_{\mathcal{B}}(F) \cap \mathcal{S}_{\mathcal{B}}(H)$  and  $V = \mathcal{M}(F) \cap \mathcal{M}(F_{\text{pl}}) \cap S$  as before. Then by Lemma 11,  
141 we have

$$\begin{aligned}
\mathcal{N}(V) \cap V^c \cap S &= (\mathcal{N}(V) \cap \mathcal{M}^c(F) \cap S) \cup (\mathcal{N}(V) \cap \mathcal{M}^c(F_{\text{pl}}) \cap S) \\
&\subseteq \emptyset \cup \mathcal{M}_{\text{pl}}(F) = \mathcal{M}_{\text{pl}}(F).
\end{aligned}$$

142 Therefore, we have

$$\begin{aligned}
\mathcal{N}(V) \cap V^c &= \mathcal{N}(V) \cap V^c \cap (S \cup S^c) \\
&= (\mathcal{N}(V) \cap V^c \cap S) \cup (\mathcal{N}(V) \cap V^c \cap S^c) \\
&\subseteq \mathcal{M}_{\text{pl}}(F) \cup S^c.
\end{aligned}$$

143 Thus, by the  $c$ -expansion property, we have

$$\begin{aligned}
Q(\mathcal{M}_{\text{pl}}(F) \cup S^c) &\geq Q(\mathcal{N}(V) \cap V^c) \\
&\geq Q(\mathcal{N}(V)) - Q(V) \\
&\geq (c(Q(V)) - 1)Q(V).
\end{aligned}$$

144 Since  $V \subseteq \mathcal{M}(F_{\text{pl}})$ ,  $c$  is non-increasing, and  $\gamma_H > 1$ , we have  $Q(V) \leq Q(\mathcal{M}_{\text{pl}}(F) \cup S^c) / (\gamma_H - 1) \leq q$ . This completes the proof.  $\square$

146 The following lemma provides an upper bound of  $Q(\mathcal{N}_3)$ .

147 **LEMMA 13.** *Suppose that the assumptions of Lemma 10 hold. We have*

$$Q(\mathcal{N}_3) \leq q + Q(\mathcal{S}_B^c(F) \cup \mathcal{S}_B^c(H)) + Q(\mathcal{M}_{\text{pl}}(F)) - Q(\mathcal{M}(F_{\text{pl}})),$$

148 where  $q$  is defined by (10).

149 *Proof.* We let  $S = \mathcal{S}_B(F) \cap \mathcal{S}_B(H)$ . First, we prove

$$\mathcal{N}_3 \sqcup (\mathcal{M}_{\text{pl}}^c(F) \cap S) = \mathcal{N}_1 \sqcup (\mathcal{M}^c(F_{\text{pl}}) \cap S). \quad (11)$$

150 Here, for sets  $A, B$ , we denote union  $A \cup B$  by  $A \sqcup B$  if the union is disjoint. By definition, we have  
151  $\mathcal{N}_1 = S \cap \mathcal{M}_{\text{pl}}^c(F) \cap \mathcal{M}(F_{\text{pl}})$  and  $\mathcal{N}_3 = S \cap \mathcal{M}_{\text{pl}}(F) \cap \mathcal{M}^c(F_{\text{pl}})$ . Thus, we have

$$\begin{aligned} & \mathcal{N}_3 \cup (\mathcal{M}_{\text{pl}}^c(F) \cap S) \\ &= (S \cap \mathcal{M}_{\text{pl}}(F) \cap \mathcal{M}^c(F_{\text{pl}})) \cup (\mathcal{M}_{\text{pl}}^c(F) \cap S) \\ &= S \cap \{(\mathcal{M}_{\text{pl}}(F) \cap \mathcal{M}^c(F_{\text{pl}})) \cup \mathcal{M}_{\text{pl}}^c(F)\} \\ &= S \cap (\mathcal{M}^c(F_{\text{pl}}) \cup \mathcal{M}_{\text{pl}}^c(F)). \end{aligned}$$

152 Similarly, we have the following:

$$\begin{aligned} & \mathcal{N}_1 \cup (\mathcal{M}^c(F_{\text{pl}}) \cap S) \\ &= (S \cap \mathcal{M}_{\text{pl}}^c(F) \cap \mathcal{M}(F_{\text{pl}})) \cup (\mathcal{M}^c(F_{\text{pl}}) \cap S) \\ &= S \cap (\mathcal{M}^c(F_{\text{pl}}) \cup \mathcal{M}_{\text{pl}}^c(F)). \end{aligned}$$

153 Since disjointness is obvious by definition, we obtain (11). Next, we note that the following holds:

$$\begin{aligned} Q(\mathcal{M}_{\text{pl}}^c(F) \cap S) &= Q(\mathcal{M}_{\text{pl}}^c(F)) - Q(\mathcal{M}_{\text{pl}}^c(F) \cap S^c) \\ &\geq Q(\mathcal{M}_{\text{pl}}^c(F)) - Q(S^c). \end{aligned} \quad (12)$$

154 By (11), we obtain the following:

$$\begin{aligned} Q(\mathcal{N}_3) &= Q(\mathcal{N}_1) + Q(\mathcal{M}^c(F_{\text{pl}}) \cap S) - Q(\mathcal{M}_{\text{pl}}^c(F) \cap S) \\ &\leq Q(\mathcal{N}_1) + Q(\mathcal{M}^c(F_{\text{pl}})) - Q(\mathcal{M}^c(F_{\text{pl}}) \cap S) \\ &\leq Q(\mathcal{N}_1) + Q(\mathcal{M}^c(F_{\text{pl}})) - Q(\mathcal{M}_{\text{pl}}^c(F)) + Q(S^c) \\ &\leq q + Q(\mathcal{M}^c(F_{\text{pl}})) - Q(\mathcal{M}_{\text{pl}}^c(F)) + Q(S^c) \\ &= q - Q(\mathcal{M}(F_{\text{pl}})) + Q(\mathcal{M}_{\text{pl}}(F)) + Q(S^c). \end{aligned}$$

155 Here the second inequality follows from (12) and the third inequality follows from Lemma 12. This  
156 completes the proof.  $\square$

157 Now, we can prove Lemma 10 as follows.

*Proof of Lemma 10.*

$$\begin{aligned} Q(\mathcal{M}(F)) &= Q(\mathcal{M}(F) \cap \mathcal{S}_B(F) \cap \mathcal{S}_B(H)) + Q(\mathcal{M}(F) \cap (\mathcal{S}_B^c(F) \cup \mathcal{S}_B^c(H))) \\ &\leq Q(\mathcal{N}_1 \cup \mathcal{N}_2) + Q(\mathcal{N}_3) + Q(\mathcal{S}_B^c(F) \cup \mathcal{S}_B^c(H)) \\ &\leq 2q + 2Q(\mathcal{S}_B^c(F) \cup \mathcal{S}_B^c(H)) + Q(\mathcal{M}_{\text{pl}}(F)) - Q(\mathcal{M}(F_{\text{pl}})). \end{aligned}$$

158 Here, the last inequality follows from Lemmas 12 and 13. Since  $q$  satisfies  $q \leq$   
159  $\frac{Q(\mathcal{M}_{\text{pl}}(F)) + Q(\mathcal{S}_B^c(F) \cup \mathcal{S}_B^c(H))}{\gamma_H - 1}$  by (10), we have our assertion.  $\square$

160 **C.4 Miscellaneous Proofs for Examples**

161 *Proof of Example 3.* In Example 3, we stated that  $p \mapsto R_h(p)/p$  is non-increasing. This follows  
 162 from the concavity of  $R_h$  and  $\lim_{p \rightarrow +0} R_h(p) = 0$ . In fact, we can prove the concavity of  $R_h$  by  
 163  $\frac{d^2 R_h}{dp^2}(p) = -h \exp\left(\frac{\xi^2}{2} - h\xi - \frac{1}{2}h^2\right) \leq 0$ , where  $\xi = \Phi^{-1}(p)$ .  $\square$

164 *Proof of Example 9.* For each  $i, j \in [K]$ ,  $w_i P_i(x) \geq w_j P_j(x)$  is equivalent to  $(x - \tau_i) \cdot v_{ji} \leq$   
 165  $\frac{\|\tau_i - \tau_j\|}{2} + \frac{2(\log w_i - \log w_j)}{d\|\tau_i - \tau_j\|}$ , where  $v_{ji} = \frac{\tau_j - \tau_i}{\|\tau_i - \tau_j\|}$ . Thus, for each  $i \in [K]$ , we have  $\bigcap_{j \in [K] \setminus \{i\}} X_{ij} \subseteq$   
 166  $\mathcal{S}_{\mathcal{B}}(F_{\text{opt}})$ . Here  $X_{ij}$  is defined as  $\{x \in \mathcal{X} : (x - \tau_i) \cdot v_{ji} \leq \frac{\|\tau_i - \tau_j\|}{2} + \frac{2(\log w_i - \log w_j)}{d\|\tau_i - \tau_j\|} - \frac{r}{2}\}$ .  
 167 For any  $w \in \mathbb{R}^d$  with  $\|w\|_2 = \sqrt{d}$  and  $a > 0$ , we have  $P_i(\{x \in \mathcal{X} : (x - \tau_i) \cdot w > a\}) =$   
 168  $1 - \Phi(a) \leq \frac{1}{2} \exp(-a^2/2)$  (c.f., [2]). Thus,  $P_i(X_{ij}^c) \leq \frac{1}{2} \exp(-da_{ij}^2/2)$ , where  $a_{ij} = \frac{\|\tau_i - \tau_j\|}{2} +$   
 169  $\frac{2(\log w_i - \log w_j)}{d\|\tau_i - \tau_j\|} - \frac{r}{2}$ . By assumptions, we have  $a_{ij} \sqrt{d} \gtrsim \sqrt{\log d}$ . Therefore,  $P_i(X_{ij}^c) = O(\frac{1}{\text{poly}(d)})$ .  
 170 It follows that  $P_i(\mathcal{S}_{\mathcal{B}}^c(F_{\text{opt}})) \leq \sum_{j \in [K] \setminus \{i\}} P_i(X_{ij}^c) = O(\frac{1}{\text{poly}(d)})$ . Thus, we have  $R_{\mathcal{B}, w}(F_{\text{opt}}) =$   
 171  $O(\frac{1}{\text{poly}(d)})$ . By the same way, we can prove that  $\text{Err}_w(F_{\text{opt}}) = O(\frac{1}{\text{poly}(d)})$ .  $\square$

172 **D All-Layer Margin Generalization Bounds**

173 Following [14, 13], we introduce all layer margin of neural networks and provide general-  
 174 ization bounds of CSST. In this section, we assume that classifier  $F(x)$  is given as  $F(x) =$   
 175  $\text{argmax}_{1 \leq i \leq K} \Phi_i(x)$ , where  $\Phi$  is a neural network of the form

$$\Phi(x) = (f_p \circ f_{p-1} \circ \dots \circ f_1)(x).$$

176 Here  $f_i : \mathbb{R}^{d_i} \rightarrow \mathbb{R}^{d_{i+1}}$  with  $d_1 = d$  and  $d_p = K$ . We assume that each  $f_i$  belongs to a function class  
 177  $\mathcal{F}_i \subset \text{Map}(\mathbb{R}^{d_i}, \mathbb{R}^{d_{i+1}})$ . We define a function class  $\mathcal{F}$  to which  $\Phi$  belongs by

$$\mathcal{F} = \{\Phi : \mathbb{R}^d \rightarrow \mathbb{R}^K : \Phi(x) = (f_p \circ \dots \circ f_1)(x), \quad f_i \in \mathcal{F}_i, \forall i\}.$$

178 For example, for  $b > 0$ ,  $\mathcal{F}_i$  is given as  $\{h \mapsto W\phi(h) : W \in \mathbb{R}^{d_i \times d_{i+1}}, \|W\|_{\text{fro}} \leq b\}$  if  $i > 1$   
 179 and  $\{h \mapsto Wh : W \in \mathbb{R}^{d_1 \times d_2}, \|W\|_{\text{fro}} \leq b\}$  if  $i = 1$ , where  $\phi$  is a link function (applied on  $\mathbb{R}^{d_i}$   
 180 entry-wise) with bounded operator norm (i.e.,  $\|\phi\|_{\text{op}} := \sup_{x \in \mathbb{R}^{d_i} \setminus \{0\}} \|\phi(x)\|_2 / \|x\|_2 < \infty$ ) and  
 181  $\|W\|_{\text{fro}}$  denotes the Frobenius norm of the matrix. However, we do not assume the function class  
 182  $\mathcal{F}_i$  does not have this specific form. We assume that each function class  $\mathcal{F}_i$  is a normed vector  
 183 space with norm  $\|\cdot\|$ . In the example above, we consider the operator norm, i.e., if  $f(h) = \phi(Wh)$ ,  
 184  $\|f\|$  is defined as  $\|f\|_{\text{op}}$ . Let  $x_1, \dots, x_n$  be a finite i.i.d. sequence of samples drawn from  $\mathcal{P}_w$ .  
 185 We denote the corresponding empirical distribution by  $\hat{P}_w$ , i.e., for a measurable function  $f$  on  $\mathcal{X}$ ,  
 186  $\mathbf{E}_{x \sim \hat{P}_w} [f] = \sum_{i=1}^n f(x_i)$ .

187 For  $\xi = (\xi_1, \dots, \xi_p) \in \prod_{i=1}^p \mathbb{R}^{d_i}$ , we define the perturbed output  $\Phi(x, \xi)$  as  $\Phi(x, \xi) = h_p(x, \xi)$ ,  
 188 where

$$\begin{aligned} h_1(x, \xi) &= f_1(x) + \xi_1 \|x\|_2, \\ h_i(x, \xi) &= f_i(h_{i-1}(x, \xi)) + \xi_i \|h_{i-1}(x, \xi)\|_2, \quad \text{for } 2 \leq i \leq p. \end{aligned}$$

189 Let  $x \in \mathcal{X}$  and  $y \in [K]$ . We define  $\Xi(\Phi, x, y)$  by  $\{\xi \in \prod_{i=1}^p \mathbb{R}^{d_i} : \text{argmax}_i \Phi_i(x, \xi) \neq y\}$ . Then,  
 190 the all-layer margin  $m(\Phi, x, y)$  is defined as

$$m(\Phi, x, y) = \min_{\xi \in \Xi(\Phi, x, y)} \|\xi\|_2,$$

191 where  $\|\xi\|_2$  is given by  $\sqrt{\sum_{i=1}^p \|\xi_i\|_2^2}$ . Following [14], we define a variant of the all-layer margin  
 192 that measures robustness of  $\Phi$  with respect to input transformations defined by  $\mathcal{B}(x)$  as follows:

$$m_{\mathcal{B}}(\Phi, x) := \min_{x' \in \mathcal{B}(x)} m(F, x', \text{argmax}_i \Phi_i(x)).$$

193 **ASSUMPTION 14** (c.f. [13], Condition A.1). Let  $\mathcal{G}$  be a normed space with norm  $\|\cdot\|$  and  $\epsilon > 0$ .  
 194 We say  $\mathcal{G}$  satisfies the  $\epsilon^{-2}$  covering condition with complexity  $\mathcal{C}_{\|\cdot\|}(\mathcal{G})$  if for all  $\epsilon > 0$ , we have

$$\log \mathcal{N}_{\|\cdot\|}(\epsilon, \mathcal{G}) \leq \frac{\mathcal{C}_{\|\cdot\|}(\mathcal{G})}{\epsilon^2}.$$

195 Here  $\mathcal{N}_{\|\cdot\|}(\epsilon, \mathcal{G})$  the  $\epsilon$ -covering number of  $\mathcal{G}$ . We assume function class  $\mathcal{F}_i$  satisfies the  $\epsilon^{-2}$  covering  
 196 condition with complexity  $\mathcal{C}_{\|\cdot\|}(\mathcal{F}_i)$  for each  $1 \leq i \leq p$ .

197 Throughout this section, we suppose that Assumption 14 holds. Essentially, the following two  
 198 propositions follows were proved by Wei et al. [14]:

199 **PROPOSITION 15** (c.f., [14], Lemma D.6). *With probability at least  $1 - \delta$  over the draw of the*  
 200 *training data, for all  $t \in (0, \infty)$ , any  $\Phi \in \mathcal{F}$  satisfies the following:*

$$R_{\mathcal{B},w}(F) = \mathbf{E}_{\hat{\mathcal{P}}_w} [\mathbf{1}(m_{\mathcal{B}}(\Phi, x) \leq t)] + \tilde{O} \left( \frac{\sum_{i=1}^p \mathcal{C}_{\|\cdot\|_{\text{op}}}(\mathcal{F}_i)}{t\sqrt{n}} \right) + \zeta,$$

201 where  $\zeta = O \left( \sqrt{\frac{\log(1/\delta) + \log n}{n}} \right)$  is a lower order term and  $F(x) = \operatorname{argmax}_{i \in [K]} \Phi_i(x)$ .

202 **PROPOSITION 16** (c.f., [14], Theorem D.3). *With probability at least  $1 - \delta$  over the draw of the*  
 203 *training data, for all  $t \in (0, \infty)$ , any  $\Phi \in \mathcal{F}$  satisfies the following:*

$$L_w(F, F_{\text{pl}}) = \mathbf{E}_{\hat{\mathcal{P}}_w} [\mathbf{1}(m(\Phi, x, F_{\text{pl}}(x)) \leq t)] + \tilde{O} \left( \frac{\sum_{i=1}^p \mathcal{C}_{\|\cdot\|_{\text{op}}}(\mathcal{F}_i)}{t\sqrt{n}} \right) + \zeta,$$

204 where  $\zeta = O \left( \sqrt{\frac{\log(1/\delta) + \log n}{n}} \right)$  is a lower order term and  $F(x) = \operatorname{argmax}_{i \in [K]} \Phi_i(x)$ .

205 **REMARK.** Although we have proved Theorem 5 following [14], we had to provide our own proof  
 206 due to some differences in theoretical assumptions (e.g., non-existence of the ground-truth classifier,  
 207 a difference mentioned in the remark just after Assumption 4). On the other hand, the proofs of [14,  
 208 Lemma D.6] and [14, Theorem D.3] work for any distribution  $P$  on  $\mathcal{X}$  and its empirical distribution  
 209  $\hat{P}$ . Since  $\|w\|_1 \mathcal{P}_w(\mathcal{S}_{\mathcal{B}}^c(F)) = R_{\mathcal{B},w}(F)$  and  $\|w\|_1 \mathcal{P}_w(\{x : F(x) \neq F_{\text{pl}}(x)\}) = L_w(F, F_{\text{pl}})$ ,  
 210 Proposition 15 and Proposition 16 follow from the corresponding results in [14].

211 **THEOREM 17.** *Suppose Assumption 4 and Assumption 14 hold. Then, with probability at least  $1 - \delta$*   
 212 *over the draw of the training data, for all  $t_1, t_2 \in (0, \infty)$ , and any neural network  $\Phi$  in  $\mathcal{F}$ , we have*  
 213 *the following:*

$$\begin{aligned} \text{Err}_w(F) &= \frac{\gamma + 1}{\gamma - 1} \mathbf{E}_{\hat{\mathcal{P}}_w} [\mathbf{1}(m(\Phi, x, F_{\text{pl}}(x)) \leq t_1)] + \frac{2\gamma}{\gamma - 1} \mathbf{E}_{\hat{\mathcal{P}}_w} [\mathbf{1}(m_{\mathcal{B}}(\Phi, x) \leq t_2)] \\ &\quad - \text{Err}_w(F_{\text{pl}}) + 2\text{Err}_w(F^*) + \frac{2\gamma}{\gamma - 1} R_{\mathcal{B},w}(F^*) \\ &\quad + \tilde{O} \left( \frac{\sum_{i=1}^p \mathcal{C}_{\|\cdot\|_{\text{op}}}(\mathcal{F}_i)}{t_1\sqrt{n}} \right) + \tilde{O} \left( \frac{\sum_{i=1}^p \mathcal{C}_{\|\cdot\|_{\text{op}}}(\mathcal{F}_i)}{t_2\sqrt{n}} \right) + \zeta, \end{aligned}$$

214 where  $\zeta = O \left( \sqrt{\frac{\log(1/\delta) + \log n}{n}} \right)$  is a lower order term and  $F(x) = \operatorname{argmax}_{i \in [K]} \Phi_i(x)$ .

215 *Proof.* By (9) with  $H = F^*$  and  $-\mathbf{1}(F_{\text{pl}}(x) \neq F^*(x)) \leq -\mathbf{1}(F_{\text{pl}}(x) \neq j) + \mathbf{1}(F^*(x) \neq j)$  for any  
 216  $x \in \mathcal{X}$  and  $j \in [K]$ , we obtain the following inequality:

$$\text{Err}_w(F) \leq \frac{\gamma + 1}{\gamma - 1} L_w(F, F_{\text{pl}}) + \frac{2\gamma}{\gamma - 1} R_{\mathcal{B},w}(F) + \frac{2\gamma}{\gamma - 1} R_{\mathcal{B},w}(F^*) - \text{Err}_w(F_{\text{pl}}) + 2\text{Err}_w(F^*).$$

217 Then, the statement of the theorem follows from Proposition 15 and Proposition 16.  $\square$

## 218 E Proof of Proposition 6

219 *Proof.* Let the average weighted consistency loss be  $\mathcal{L}_u^{wt} = \frac{1}{|B|} \sum_{x \in B} \ell_u^{wt}(\hat{p}_m(x), p_m(\mathcal{A}(x)), \mathbf{G})$   
 220 this will be minimized if for each of  $x \in B$  the  $\ell_u^{wt}(\hat{p}_m(x), p_m(\mathcal{A}(x)), \mathbf{G})$  is minimized. This



221 expression can be expanded as:

$$\begin{aligned}
 \ell_u^{wt}(\hat{p}_m(x), p_m(\mathcal{A}(x)), \mathbf{G}) &= - \sum_{i=1}^K (\mathbf{G}^T \hat{p}_m(x))_i \log(p_m(\mathcal{A}(x))_i) \\
 &= -C \sum_{i=1}^K \frac{(\mathbf{G}^T \hat{p}_m(x))_i}{\sum_{j=1}^m \mathbf{G}^T \hat{p}_m(x)_j} \log(p_m(\mathcal{A}(x))_i) \\
 &= C \times \text{H}(\text{norm}(\mathbf{G}^T \hat{p}_m(x)) \parallel p_m(\mathcal{A}(x))).
 \end{aligned}$$

222 Here we use  $\text{H}$  to denote the cross entropy between two distributions. As we don't backpro-  
 223 propagate gradients from the  $\hat{p}_m(x)$  (pseudo-label) branch of prediction network we can consider  
 224  $C = \sum_{j=1}^m \mathbf{G}^T \hat{p}_m(x)_j$  as a constant in our analysis. Also adding a constant term of entropy  
 225  $\text{H}(\text{norm}(\mathbf{G}^T \hat{p}_m(x)))$  to cross entropy term and dropping constant  $C$  doesn't change the outcome of  
 226 minimization. Hence we have the following:

$$\begin{aligned}
 \min_{p_m} \text{H}(\text{norm}(\mathbf{G}^T \hat{p}_m(x)) \parallel p_m(\mathcal{A}(x))) &= \min_{p_m} \text{H}(\text{norm}(\mathbf{G}^T \hat{p}_m(x)) \parallel p_m(\mathcal{A}(x))) \\
 &\quad + \text{H}(\text{norm}(\mathbf{G}^T \hat{p}_m(x))) \\
 &= \min_{p_m} \mathcal{D}_{KL}(\text{norm}(\mathbf{G}^T \hat{p}_m(x)) \parallel p_m(\mathcal{A}(x))).
 \end{aligned}$$

227 This final term is the  $\mathcal{D}_{KL}(\mathbf{G}^T \hat{p}_m(x) \parallel p_m(\mathcal{A}(x)))$  which is obtained by using the identity  
 228  $\mathcal{D}_{KL}(p, q) = \text{H}(p, q) + \text{H}(p)$  where  $p, q$  are the two distributions.  $\square$

## 229 F Notation

230 We provide the list of notations commonly used in the paper in Table 1.

## 231 G Code, License, Assets and Computation Requirements

### 232 G.1 Code and Licenses of Assets

233 In this work, we use the open source implementation of FixMatch [12]<sup>1</sup> in PyTorch, which is  
 234 licensed under MIT License for educational purpose. Also for NLP experiments we make use of  
 235 DistilBERT [11] pretrained model available in the HuggingFace [15] library. We promise to release  
 236 the code and checkpoints at the time of acceptance of our submission.

### 237 G.2 Computational Requirements

238 All experiments were done on a variety of GPUs, with primarily Nvidia A5000 (24GB) with  
 239 occasional use of Nvidia A100 (80GB) and Nvidia RTX3090 (24GB). For finetuning DistilBERT and  
 240 all experiments with ImageNet-100 dataset we used PyTorch data parallel over 4 A5000s. Training  
 241 was done till no significant change in metrics was observed. The detailed list of computation used per  
 242 experiment type and dataset have been tabulated in Table 2 and Table 3.

## 243 H Objective

### 244 H.1 Logit Adjusted Weighted Consistency Regularizer

245 As we have introduced weighted consistency regularizer in Eq. 6 for utilizing unlabeled data, we  
 246 now provide logit adjusted variant of it for training deep networks in this section. We provide logit

<sup>1</sup><https://github.com/LeeDoYup/FixMatch-pytorch>

Table 1: Table of Notations used in Paper

---

|                              |   |                                                                                                                       |
|------------------------------|---|-----------------------------------------------------------------------------------------------------------------------|
| $\mathcal{Y}$                | : | Label space                                                                                                           |
| $\mathcal{X}$                | : | Instance space                                                                                                        |
| $K$                          | : | Number of classes                                                                                                     |
| $\pi_i$                      | : | prior for class $i$                                                                                                   |
| $F$                          | : | a classifier model                                                                                                    |
| $s$                          | : | a scoring function, $\mathcal{X} \rightarrow \mathbb{R}^K$                                                            |
| $D$                          | : | data distribution                                                                                                     |
| $\lambda$                    | : | Lagrange multiplier                                                                                                   |
| $\lambda_u$                  | : | coefficient of unlabeled loss                                                                                         |
| $\text{rec}_i[F]$            | : | recall of $i^{\text{th}}$ class for a classifier $F$                                                                  |
| $\text{acc}[F]$              | : | accuracy for a classifier $F$                                                                                         |
| $\text{prec}_i[F]$           | : | precision of $i^{\text{th}}$ class for a classifier $F$                                                               |
| $\text{cov}_i[F]$            | : | coverage for $i^{\text{th}}$ class for a classifier $F$                                                               |
| $\mathbf{G}$                 | : | a $K \times K$ matrix                                                                                                 |
| $\mathbf{D}$                 | : | a $K \times K$ diagonal matrix                                                                                        |
| $\mathbf{M}$                 | : | a $K \times K$ matrix                                                                                                 |
| $\mu$                        | : | ratio of labelled to unlabelled samples                                                                               |
| $B$                          | : | batch size for FixMatch                                                                                               |
| $\ell_u^{\text{wt}}$         | : | loss for unlabelled data using pseudo label                                                                           |
| $\ell_s^{\text{hyb}}$        | : | loss for labelled data                                                                                                |
| $\mathcal{L}_u^{\text{hyb}}$ | : | average loss for unlabelled data using pseudo label on a batch of samples                                             |
| $\mathcal{L}_s^{\text{hyb}}$ | : | average loss for labelled data on a batch of samples                                                                  |
| $H$                          | : | cross entropy function                                                                                                |
| $\mathcal{A}$                | : | a $\mathcal{X} \rightarrow \mathcal{X}$ function that is stochastic in nature and applies a strong augmentation to it |
| $\alpha$                     | : | a $\mathcal{X} \rightarrow \mathcal{X}$ function that is stochastic in nature and applies a weak augmentation to it   |
| $\rho$                       | : | imbalance factor                                                                                                      |
| $B$                          | : | batch size of samples                                                                                                 |
| $B_s$                        | : | batch of labelled samples                                                                                             |
| $B_u$                        | : | batch of unlabelled samples                                                                                           |
| $x$                          | : | an input sample, $x \in \mathcal{X}$                                                                                  |
| $\hat{p}_m$                  | : | a pseudo label generating function                                                                                    |
| $p_m$                        | : | distribution of confidence for a model's prediction on a given sample                                                 |
| $w$                          | : | a $K \times K$ weight matrix that corresponds to a gain matrix $\mathbf{G}$                                           |
| $\text{Err}_w(F)$            | : | weighted error of $F$ that corresponds to the objective of CSL                                                        |
| $\mathcal{P}_w$              | : | weighted distribution on $\mathcal{X}$                                                                                |
| $\mathcal{P}_i$              | : | <b>class conditional distribution of samples for class <math>i</math></b>                                             |
| $R_{\mathcal{B},w}(F)$       | : | theoretical weighted (cost sensitive) consistency regularizer                                                         |
| $F_{\text{pl}}$              | : | a pseudo labeler                                                                                                      |
| $L_w(F, F_{\text{pl}})$      | : | weighted error between $F$ and $F_{\text{pl}}$                                                                        |
| $\mathcal{L}_w(F)$           | : | theoretical CSST loss                                                                                                 |
| $c$                          | : | a non-increasing function used in the definition of the $c$ -expansion property (Definition 2)                        |
| $\gamma$                     | : | a value of $c$ defined in Assumption 4                                                                                |
| $\beta$                      | : | an upper bound of $R_{\mathcal{B},w}(F)$ in the optimization problem (4)                                              |
| $S^c$                        | : | the complement of a set $S$                                                                                           |

---

| Method           | CIFAR-10  | CIFAR-100   | ImageNet-100 |
|------------------|-----------|-------------|--------------|
| ERM              | A5000     | A5000       | RTX3090      |
|                  | 49m       | 6h 47m      | 15h 8m       |
| LA               | RTX3090   | A5000       | A5000        |
|                  | 39m       | 6h 9m       | 15h 7m       |
| CSL              | A5000     | A5000       | A5000        |
|                  | 47m       | 6h 40m      | 12h          |
| CSST(FixMatch)   | 4 X A5000 | 4 X A100    | 4 X A5000    |
| w/o KL-Threshold | 21h 0m    | 2d 19h 16 m | 2d 13h 19m   |
| CSST(FixMatch)   | 4 X A5000 | 4 X A5000   | 4 X A5000    |
|                  | 21h 41m   | 2d 11h 52m  | 2d 4m        |

Table 2: Computational requirements and training time (d:days, h:hours, m:minutes) for experiments relevant to vision datasets. As we can see some of the experiments on the larger datasets such as ImageNet requires long compute times.

| Method    | IMDb( $\rho = 10$ ) | IMDb( $\rho = 100$ ) | DBpedia-14 |
|-----------|---------------------|----------------------|------------|
| ERM       | 4 X A5000           | 4 X A5000            | 4 X A5000  |
|           | 25m                 | 29m                  | 2h 44m     |
| UDA       | 4 X A5000           | 4 X A5000            | 4 X A5000  |
|           | 44m                 | 32m                  | 10h 18m    |
| CSST(UDA) | 4 X A5000           | 4 X A5000            | 4 X A5000  |
|           | 49m                 | 35m                  | 13h 12m    |

Table 3: Computational requirements and training time(d:days, h:hours, m:minutes) for experiments done on NLP datasets. The DistilBERT model which we are using is pretrained on a language modeling task, hence it requires much less time for training in comparison to vision models which are trained from scratch.

247 adjusted term for  $\ell_u^{\text{wt}}(\hat{p}_m(x), p_m(\mathcal{A}(x), \mathbf{G}))$  below:

$$\begin{aligned}
\ell_u^{\text{wt}}(\hat{p}_m(x), p_m(\mathcal{A}(x), \mathbf{G})) &= - \sum_{i=1}^K (\mathbf{G}^{\text{T}} \hat{p}_m(x))_i \log(p_m(\mathcal{A}(x))_i) \\
&= - \sum_{i=1}^K (\mathbf{G}^{\text{T}} \hat{p}_m(x))_i \log \left( \frac{\exp(\mathbf{s}(\mathcal{A}(x))_i)}{\sum_{j=1}^K \exp(\mathbf{s}(\mathcal{A}(x))_j)} \right) \\
&= - \sum_{i=1}^K (\mathbf{D}^{\text{T}} \mathbf{M}^{\text{T}} \hat{p}_m(x))_i \log \left( \frac{\exp(\mathbf{s}(\mathcal{A}(x))_i)}{\sum_{j=1}^K \exp(\mathbf{s}(\mathcal{A}(x))_j)} \right)
\end{aligned}$$

248 The above expression comes from the decomposition  $\mathbf{G} = \mathbf{M}\mathbf{D}$ . The above loss function can be  
249 converted into it’s logit adjusted equivalent variant by following transformation as suggested by  
250 Narasimhan and Menon [8] which is equivalent in terms of optimisation of deep neural networks:

$$\ell_u^{\text{wt}}(\hat{p}_m(x), p_m(\mathcal{A}(x), \mathbf{G})) \equiv - \sum_{i=1}^K (\mathbf{M}^{\text{T}} \hat{p}_m(x))_i \log \left( \frac{\exp(\mathbf{s}(\mathcal{A}(x))_i - \log(\mathbf{D}_{ii}))}{\sum_{j=1}^K \exp(\mathbf{s}(\mathcal{A}(x))_j - \log(\mathbf{D}_{jj}))} \right) \quad (13)$$

251 The above loss is the consistency loss  $\ell_u^{\text{wt}}$  that we practically implement for CSST. Further in case  
252  $\hat{p}_m(x)$  is a hard pseudo label  $y$  as in FixMatch, the above weighted consistency loss reduces to  
253  $\ell^{\text{hyb}}(y, \mathbf{s}(\mathcal{A}(x)))$ . Further in case the gain matrix  $G$  is diagonal the above loss will converge to  
254  $\ell^{\text{LA}}(y, \mathbf{s}(\mathcal{A}(x)))$ . Thus the weighted consistency regularizer can be converted to logit adjusted  
255 variants  $\ell^{\text{LA}}$  and  $\ell^{\text{hyb}}$  based on  $\mathbf{G}$  matrix.

## 256 H.2 CSST(FixMatch)

257 In FixMatch, we use the prediction made by the model on a sample  $x$  after applying a weak  
258 augmentation  $\alpha$  and is used to get a hard pseudo label for the models prediction on a strongly

259 augmented sample i.e.  $\mathcal{A}(x)$ . The set of weak augmentations include horizontal flip, We shall refer  
 260 to this pseudo label as  $\hat{p}_m(x)$ . The list of strong augmentations are given in Table 12 of Sohn et al.  
 261 [12]. Weak augmentations include padding, random horizontal flip and cropping to the desired  
 262 dimensions (32X32 for CIFAR and 224X224 for ImageNet). Given a batch of labeled and unlabeled  
 263 samples  $B_s$  and  $B_u$ , CSST modifies the supervised and un-supervised component of the loss function  
 264 depending upon the non-decomposable objective and its corresponding gain matrix  $\mathbf{G}$  at a given  
 265 time during training. We assume that in the dataset, a sample  $x$ , be it labeled or unlabeled is already  
 266 weakly augmented. vanilla FixMatch’s supervised component of the loss function is a simple  
 267 cross entropy loss whereas in our CSST(FixMatch) it is replaced by  $\ell_s^{\text{hyb}}$ .

$$\mathcal{L}_s^{\text{hyb}} = \frac{1}{|B_s|} \sum_{x,y \in B_s} \ell^{\text{hyb}}(y, s(x)). \quad (14)$$

268

$$\mathcal{L}_u^{\text{wt}} = \frac{1}{|B_u|} \sum_{x \in B_u} \mathbb{1}_{(\mathcal{D}_{KL}(\text{norm}(\mathbf{G}^T \hat{p}_m(x)) \parallel p_m(x)) \leq \tau)} \ell_u^{\text{wt}}(\hat{p}_m(x), p_m(\mathcal{A}(x)), \mathbf{G}). \quad (15)$$

269 In the above expression  $p_m(x) = \text{softmax } s(x)$ . The component of the loss function for unlabeled  
 270 data (i.e. consistency regularization) is where one of our contributions w.r.t the novel thresholding  
 271 mechanism comes into light. vanilla FixMatch selects unlabeled samples for which consistency  
 272 loss is non-zero, such that the model’s confidence on the most likely predicted class is above a  
 273 certain threshold. We rather go for a threshold mechanism that select based on the basis of degree of  
 274 distribution match to a target distribution based on  $\mathbf{G}$ . The final loss function  $\mathcal{L} = \mathcal{L}_s^{\text{hyb}} + \lambda_u \mathcal{L}_u^{\text{wt}}$ ,  
 275 i.e. a linear combination of  $\mathcal{L}_s^{\text{hyb}}$  and  $\mathcal{L}_u^{\text{wt}}$ . Since for FixMatch we are dealing with Wide-ResNets  
 276 and ResNets which are deep networks, as mentioned in Section H.1, we shall use the alternate logit  
 277 adjusted formulation as mentioned in Eq. 13 as substitute for  $\ell_u^{\text{wt}}$  in Eq. 15.

### 278 H.3 CSST(UDA)

279 The loss function of UDA is a linear combination of supervised loss and consistency loss on unlabeled  
 280 samples. The former is the cross entropy (CE) loss, while the latter for the unlabeled samples  
 281 minimizes the KL-divergence between the model’s predicted label distribution on an input sample  
 282 and its augmented sample. Often the predicted label distribution on the unaugmented sample is  
 283 sharpened. The augmentation we used was a English-French-English backtranslation based on the  
 284 MarianMT [4] fast neural machine translation model. In UDA supervised component of the loss  
 285 is annealed using a method described as Training Signal Annealing (TSA), where the CE loss is  
 286 considered only for those labeled samples whose  $\max_i p_m(x)_i < \tau_t$ , where  $t$  is a training time step.  
 287 We observed that using TSA in a long tailed setting leads to overfitting on the head classes and hence  
 288 chose to not include the same in our final implementation.

289 CSST modifies the supervised and unsupervised component of the loss function in UDA depending  
 290 upon a given objective and its corresponding gain matrix  $\mathbf{G}$  at a given time during training. The  
 291 supervised component of the loss function for a given constrained optimisation problem and a gain  
 292 matrix  $\mathbf{G}$ , is the hybrid loss  $\ell_s^{\text{hyb}}$ . For the consistency regularizer part of the loss function, we minimize  
 293 the KL-divergence between a target distribution and the model’s prediction label distribution on  
 294 its augmented version. The target distribution is  $\text{norm}(\mathbf{G}^T \hat{p}_m(x))$ , where  $\hat{p}_m(x)$  is the sharpened  
 295 prediction of the label distribution by the model. Given a batch of labeled and unlabeled samples  
 296  $B_s$  and  $B_u$ , the final loss function in CSST(UDA) is a linear combination of  $\mathcal{L}_s^{\text{hyb}}$  and  $\mathcal{L}_u^{\text{wt}}$ , i.e  
 297  $\mathcal{L} = \mathcal{L}_s^{\text{hyb}} + \lambda_u \mathcal{L}_u^{\text{wt}}$ .

$$\mathcal{L}_s^{\text{hyb}} = \frac{1}{|B_s|} \sum_{x,y \in B_s} \ell^{\text{hyb}}(p_m(x), y). \quad (16)$$

$$\mathcal{L}_u^{\text{wt}} = \frac{1}{|B_u|} \sum_{x \in B_u} \mathbb{1}_{(\mathcal{D}_{KL}(\text{norm}(\mathbf{G}^T \hat{p}_m(x)) \parallel p_m(x)) \leq \tau)} \ell_u^{\text{wt}}(\hat{p}_m(x), p_m(\mathcal{A}(x)), \mathbf{G}). \quad (17)$$

298 Since for UDA, we are dealing with DistilBERT, as mentioned in Section H.1, we shall use the  
 299 alternate formulation as mentioned in Eq. 13 as substitute for  $\ell_u^{\text{wt}}$  in Eq. above.

## 300 I Threshold mechanism for diagonal Gain Matrix

301 Consider the case when the gain matrix is a diagonal matrix. The loss function  $\mathcal{L}_u^{wt}(B_u)$  as defined  
302 in (7) makes use of a threshold function that selects samples based on the KL divergence based  
303 threshold between the target distribution as defined by the gain matrix  $\mathbf{G}$  and the models predicted  
304 distribution of confidence over the classes.

$$\text{Threshold function} := \mathbb{1}_{(\mathcal{D}_{KL}(\text{norm}(\mathbf{G}^T \hat{p}_m(x)) || p_m(x)) \leq \tau)} \quad (18)$$

305 Since  $\mathbf{G}$  is a diagonal matrix and the pseudo-label  $\hat{p}_m(x)$  is one hot, the  $\text{norm}(\mathbf{G}^T \hat{p}_m(x))$  is a  
306 one-hot vector. The threshold function’s KL divergence based criterion can be expanded as follows  
307 where  $\hat{y}$  is the pseudo-label’s maximum class’s index:

$$\mathcal{D}_{KL}(\text{norm}(\mathbf{G}^T \hat{p}_m(x)) || p_m(x)) = -\log p_m(x)_{\hat{y}} < \tau \quad (19)$$

308 The above equations represents a threshold on the negative log-confidence of the model’s prediction  
309 for a given unlabeled sample, for the pseudo-label class ( $\hat{y}$ ). This can be further simplified to  
310  $p_m(x)_{\hat{y}} \geq \exp(-\tau)$  which is simply a threshold based on the model’s confidence. Since pseudo-  
311 label is generated from the model’s prediction, this threshold is nothing but a selection criterion to  
312 select only those samples whose maximum confidence for a predicted hard pseudo-label is above  
313 a fixed threshold. This is identical to the threshold function which is used in Fixmatch [12] i.e.  
314  $\max(p_m(x)) \geq \exp(-\tau)$ . In FixMatch this  $\exp(-\tau)$  is set to 0.95.

## 315 J Dataset

316 **CIFAR-10 and CIFAR-100 [5]**, are image classification datasets of images of size 32 X 32. Both the  
317 datasets have a size of 50k samples and by default, they have a uniform sample distribution among its  
318 classes. CIFAR-10 has 10 classes while CIFAR-100 has 100 classes. The test set is a balanced set of  
319 10k images.

320 **ImageNet-100 [10]**, is an image classification dataset carved out of ImageNet-1k by selecting the  
321 first 100 classes. The distribution of samples is uniform with 1.3k samples per class. The test set  
322 contains 50 images per class. All have a resolution of 224X224, the same as the original ImageNet-1k  
323 dataset.

324 **IMDb[7]**, dataset is a binary text sentiment classification dataset. The data distribution is uniform by  
325 default and has a total 25k samples in both trainset and testset. In this work, we converted the dataset  
326 into a longtailed version of  $\rho = 10, 100$  and selected 1k labeled samples while truncating the labels  
327 of the rest and using them as unlabeled samples.

328 **DBpedia-14[6]**, is a topic classification dataset with a uniform distribution of labeled samples. The  
329 dataset has 14 classes and has a total of 560k samples in the trainset and 70k samples in the test set.  
330 Each sample, apart from the content, also has title of the article that could be used for the task of  
331 topic classification. In our experiments, we only make use of the content.

## 332 K Algorithms

333 We provide a detailed description of algorithms used for optimizing non decomposable objectives  
334 through CSST(FixMatch) and CSST(UDA). Algorithm 1 is used for experiments in Section 5 for  
335 maximizing worst-case recall (i.e. min recall using CSST(FixMatch) and CSST(UDA)). Algorithm  
336 2 is used for experiments in Section 5 for maximizing recall under coverage constraints (i.e. min  
337 coverage experiments on CIFAR10-LT, CIFAR100-LT and ImageNet100-LT).

---

**Algorithm 1** CSST-based Algorithm for Maximizing Worst-case Recall

---

Inputs: Training set  $S_s$  (labeled) and  $S_u$  (unlabeled), Validation set  $S^{\text{val}}$ , Step-size  $\omega \in \mathbb{R}_+$ , Class priors  $\pi$   
Initialize: Classifier  $h^0$ , Multipliers  $\lambda^0 \in \Delta_{K-1}$   
**for**  $t = 0$  to  $T - 1$  **do**  
  **Update  $\lambda$ :**  
     $\lambda_i^{t+1} = \lambda_i^t \exp(-\omega \cdot \text{recall}_i[F^t]), \forall i$ ,  
     $\lambda = \text{norm}(\lambda)$   
     $\mathbf{G} = \text{diag}(\lambda_1^{t+1}/\pi_1, \dots, \lambda_K^{t+1}/\pi_K)$   
  Compute  $\ell_u^{\text{wt}}, \ell_s^{\text{hyb}}$  using  $\mathbf{G}$   
  **Cost-sensitive Learning (CSL) for FixMatch:**  
     $B_u \sim S_u, B_s \sim S_s$  // Sample batches of data  
     $F^{t+1} \in \arg \min_F \sum_{B_u, B_s} \lambda_u \mathcal{L}_u^{\text{wt}} + \mathcal{L}_s^{\text{hyb}}$  // Replaced by few steps of SGD  
**end for**  
**return**  $F^T$

---

---

**Algorithm 2** CSST-based Algorithm for Maximizing Mean Recall s.t. per class coverage  $> 0.95/K$ 

---

Inputs: Training set  $S_s$  (labeled) and  $S_u$  (unlabeled), Validation set  $S^{\text{val}}$ , Step-size  $\omega \in \mathbb{R}_+$ , Class priors  $\pi$   
Initialize: Classifier  $h^0$ , Multipliers  $\lambda^0 \in \mathbb{R}_+^K$   
**for**  $t = 0$  to  $T - 1$  **do**  
  **Update  $\lambda$ :**  
     $\lambda_i^{t+1} = \lambda_i^t - \omega (\text{cov}_i[F^t] - \frac{0.95}{K}), \forall i$   
     $\lambda_i^{t+1} = \max\{0, \lambda_i^{t+1}\}, \forall i \in [K]$  // Projection to  $\mathbb{R}_+$   
     $\mathbf{G} = \text{diag}(\lambda_1^{t+1}/\pi_1, \dots, \lambda_K^{t+1}/\pi_K) + \mathbf{1}_K \lambda^\top$   
  Compute  $\ell_u^{\text{wt}}, \ell_s^{\text{hyb}}$  using  $\mathbf{G}$   
  **Cost-sensitive Learning (CSL) for FixMatch:**  
     $B_u \sim S_u, B_s \sim S_s$  // Sample batches of data  
     $F^{t+1} \in \arg \min_F \sum_{B_u, B_s} \lambda_u \mathcal{L}_u^{\text{wt}} + \mathcal{L}_s^{\text{hyb}}$  // Replaced by few steps of SGD  
**end for**  
**return**  $F^T$

---

## 338 L Details of Experiments and Hyper-parameters

339 The experiment of  $\max_F \min_i \text{recall}_i[f]$  and  $\max_F \text{recall}[F]$  s.t.  $\text{cov}_i[F] > \frac{0.95}{K}, \forall i \in [K]$   
340 was performed on the long tailed version of CIFAR-10, IMDB( $\rho = 10, 100$ ) and DBpedia-14  
341 datasets. This was because the optimisation of the aforementioned 2 objectives is stable for  
342 cases with low number of classes. Hence the objective of  $\max_F \min(\text{recall}_{\mathcal{H}}[F], \text{recall}_{\mathcal{T}}[F])$  and  
343  $\max_F \text{recall}[F]$  s.t.  $\min_{\mathcal{H}, \mathcal{T}} \text{cov}_{\mathcal{H}, \mathcal{T}}[F] > \frac{0.95}{K}$  is a relatively easier objective for datasets with large  
344 number of classes, hence were the optimisation objectives for CIFAR-100 and ImageNet-100 long  
345 tailed datasets. For all experiments for a given dataset, we used the same values for a given common  
346 hyperparameter. We ablated the threshold for our novel unlabeled sample selection criterion( $\tau$ ) and  
347 the ratio of labeled and unlabeled samples, given fixed number of unlabeled samples( $\mu$ ) and are  
348 available in Fig. 4b.

## 349 M Statistical Analysis

350 We establish the statistical soundness and validity of our results we ran our experiments on 3 different  
351 seeds. Due to the computational requirements for some of the experiments ( $\approx 2$ days) we chose to  
352 run the experiments on multiple seeds for a subset of tasks i.e. for maximising the minimum recall  
353 among all classes for CIFAR-10 LT. We observe that the std. deviation is significantly smaller than  
354 the average values for mean recall and min. recall and our performance metrics fall within our std.  
355 deviation hence validating the stability and soundness of training.

| Parameter                | CIFAR-10 | CIFAR-100 | ImageNet-100 | IMDb<br>( $\rho = 10$ ) | IMDb<br>( $\rho = 100$ ) | DBpedia-14 |
|--------------------------|----------|-----------|--------------|-------------------------|--------------------------|------------|
| $\tau$                   | 0.05     | 0.05      | 0.05         | 0.1                     | 0.1                      | 0.1        |
| $\lambda_u$              | 1.0      | 1.0       | 1.0          | 0.1                     | 0.1                      | 0.1        |
| $\mu$                    | 4.0      | 4.0       | 4.0          | 13.8                    | 12.6                     | 133        |
| $ B_s $                  | 64       | 64        | 64           | 32                      | 32                       | 32         |
| $ B_u $                  | 256      | 256       | 256          | 128                     | 128                      | 128        |
| lr                       | 3e-3     | 3e-3      | 0.1          | 1e-5                    | 1e-5                     | 1e-5       |
| $\omega$                 | 0.25     | 0.25      | 0.1          | 0.5                     | 0.5                      | 0.5        |
| SGD steps<br>before eval | 32       | 100       | 500          | 50                      | 50                       | 100        |
| optimizer                | SGD      | SGD       | SGD          | AdamW                   | AdamW                    | AdamW      |
| KL-Thresh                | 0.95     | 0.95      | 0.95         | 0.9                     | 0.9                      | 0.9        |
| Weight Decay             | 1e-4     | 1e-3      | 1e-4         | 1e-2                    | 1e-2                     | 1e-2       |
| $\rho$                   | 100      | 10        | 10           | 10                      | 100                      | 100        |
| $\lambda_u$              | 1.0      | 1.0       | 1.0          | 0.1                     | 0.1                      | 0.1        |
| Arch.                    | WRN-28-2 | WRN-28-8  | ResNet50     | DistilBERT              | DistilBERT               | DistilBERT |

Table 4: This table shows us the detailed hyper parameters used for CSST(FixMatch) for the long tailed datasets CIFAR-10, CIFAR-100, ImageNet-100 and CSST(UDA) on IMDb, DBpedia-14. All the datasets were converted to their respective long tailed versions based on the imbalance factor  $\rho$ , and a fraction of the samples were used along with their labels for supervision.

Table 5: Avg. and std. deviation of Mean Recall and Min. Recall for CIFAR-10 LT

| Method             | Mean Recall     | Min Recall      |
|--------------------|-----------------|-----------------|
| ERM                | $0.52 \pm 0.01$ | $0.27 \pm 0.02$ |
| LA                 | $0.54 \pm 0.02$ | $0.37 \pm 0.01$ |
| CSL                | $0.63 \pm 0.01$ | $0.43 \pm 0.04$ |
| Vanilla (FixMatch) | $0.78 \pm 0.01$ | $0.47 \pm 0.02$ |
| CSST(FixMatch)     | $0.75 \pm 0.01$ | $0.72 \pm 0.01$ |

## 356 N Additional Details

### 357 N.1 Formal Statement Omitted in Sec. 2.2

358 In Sec. 2.2, we stated that learning with the hybrid loss  $\ell^{\text{hyb}}$  gives the Bayes-optimal classifier for the  
359 CSL (2). However, due to space constraint, we did not provide a formal statement. In this section, we  
360 provide a formal statement of it for clarity.

361 **PROPOSITION** ([8] Proposition 4). For any diagonal matrix  $\mathbf{D} \in \mathbb{R}^{K \times K}$  with  $D_{ii} > 0, \forall i$ ,  
362  $\mathbf{M} \in \mathbb{R}^{K \times K}$ , and  $\mathbf{G} = \mathbf{MD}$ , the hybrid loss  $\ell^{\text{hyb}}$  is calibrated for  $\mathbf{G}$ . That is, for any  
363 score function  $\hat{\mathbf{s}} : \mathcal{X} \rightarrow \mathbb{R}^K$  that minimizes  $\mathbf{E}_{(x,y) \sim D} [\ell^{\text{hyb}}(y, \mathbf{s}(x))]$ , the associated classifier  
364  $F(x) = \operatorname{argmax}_{y \in [K]} \hat{s}_i(x)$  is the Bayes-optimal classifier for CSL (2).

### 365 N.2 Comparison with the $(a, \tilde{c})$ -expansion Property in [14]

366 We compare the  $c$ -expansion property with  $(a, \tilde{c})$ -expansion property proposed by [14], where  
367  $a \in (0, 1)$  and  $\tilde{c} > 1$ . Here we say a distribution  $Q$  on  $\mathcal{X}$  satisfies the  $(a, \tilde{c})$ -expansion property if  
368  $Q(\mathcal{N}(S)) \geq \tilde{c}$  for any  $S \subset \mathcal{X}$  with  $Q(S) \leq a$ . If  $Q$  satisfies  $(a, \tilde{c})$ -expansion property [14] with  
369  $\tilde{c} > 1$ , then  $Q$  satisfies the  $c$ -expansion property, where the function  $c$  is defined as follows.  $c(p) = \tilde{c}$   
370 if  $p \leq a$  and  $c(p) = 1$  otherwise. On the other hand, if  $Q$  satisfies  $c$ -expansion property, then for any  
371  $a \in (0, 1)$  and  $S \subseteq \mathcal{X}$  with  $Q(S) \leq a$ , we have  $Q(\mathcal{N}(S)) \geq c(Q(S))Q(S) \geq c(a)Q(S)$  since  $c$  is  
372 non-increasing. Therefore,  $Q$  satisfies the  $(a, c(a))$ -expansion property. Thus, we could say these two  
373 conditions are equivalent. To simplify our analysis, we use our definition of the expansion property.

374 In addition, Wei et al. [14] showed that the  $(a, \tilde{c})$ -expansion property is realistic for vision. Although  
375 they assumed the  $(a, c)$ -expansion property for each  $P_i$  ( $1 \leq i \leq K$ ) and we assume the  $c$ -expansion  
376 property for  $\mathcal{P}_w$ , it follows that the  $c$ -expansion property for  $\mathcal{P}_w$  is also realistic for vision, since  $\mathcal{P}_w$   
377 is a linear combination of  $P_i$ .

378 **N.3 Comparison of the Theoretical Assumptions with that of [14]**

379 In the last paragraph of Sec. 3.1, we explain the difference in the theoretical assumptions between  
 380 ours and [14]. Wei et al. [14] assumed the existence of the ground-truth classifier and the supports of  
 381  $P_i$  are disjoint, but we cannot assume these conditions due to our problem setting (i.e., optimizing the  
 382 cost sensitive objectives). In this section, we provide more intuitive explanation using a toy example.  
 383 For simplicity, we assume  $K = 2$ ,  $\mathcal{X} \subset \mathbb{R}$  and  $w = \text{diag}(w_1, w_2)$  with  $w_1, w_2 \geq 0$ .

384 In Fig. 1, we consider the cost sensitive (weighted) objective in the case where supports of  $P_1$   
 385 and  $P_2$  are disjoint. As the figure indicates the Bayes optimal classifier  $x \mapsto \text{argmax}_{i \in [K]} w_i P_i(x)$   
 386 for the cost sensitive objective does not depend on  $w$ . The ground truth classifier (i.e.,  $x \mapsto$   
 387  $\text{argmax}_{i \in [K]} P_i(x)$ ) is the best classifier for any  $w$ .

388 On the other hand, in Fig. 2, we consider a more generalized setting where the supports are not  
 389 necessarily disjoint. In this case, the optimal classifier for the cost sensitive objective depends on  $w$ .  
 390 This simple example suggests that we have to generalize [14] by removing the restrictive assumptions  
 391 on the supports and the ground truth classifier.

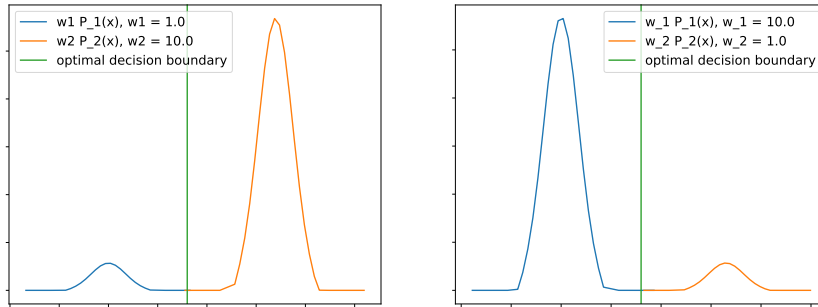

Figure 1: In the perfect setting where two distributions have disjoint supports, the Bayes optimal classifier for the CSL is identical to the ground truth classifier ( $x \mapsto \text{argmax}_i P_i(x)$ ) for any choices of weights  $(w_1, w_2)$ .

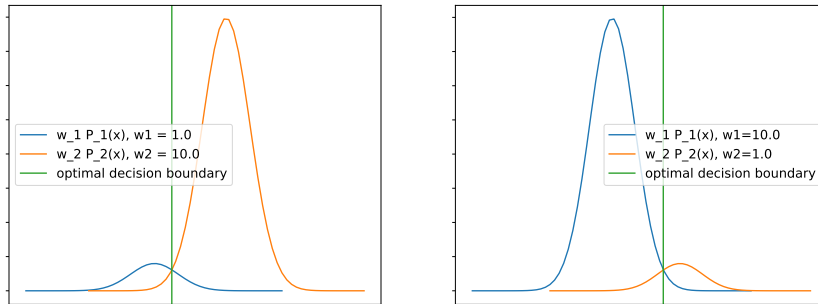

Figure 2: In more generalized settings, the Bayes optimal classifier for the CSL depends on the choice of weights (i.e., gain matrix). In the left figure, we put more weight on the second class than the first class. In the right figure, we put less weight on the second class than the first class. By decreasing the weight  $w_2$ , the optimal decision boundary for the CSL moves to the right.

392 **References**

393 [1] Sergey G Bobkov. An isoperimetric inequality on the discrete cube, and an elementary proof of  
 394 the isoperimetric inequality in gauss space. *The Annals of Probability*, 25(1):206–214, 1997. 3



- 395 [2] Marco Chiani, Davide Dardari, and Marvin K Simon. New exponential bounds and approx-  
396 imations for the computation of error probability in fading channels. *IEEE Transactions on*  
397 *Wireless Communications*, 2(4):840–845, 2003. 7
- 398 [3] Andrew Cotter, Heinrich Jiang, Maya R Gupta, Serena Wang, Taman Narayan, Seungil You,  
399 and Karthik Sridharan. Optimization with non-differentiable constraints with applications to  
400 fairness, recall, churn, and other goals. *J. Mach. Learn. Res.*, 20(172):1–59, 2019. 2
- 401 [4] Marcin Junczys-Dowmunt, Roman Grundkiewicz, Tomasz Dwojak, Hieu Hoang, Kenneth  
402 Heafield, Tom Neckermann, Frank Seide, Ulrich Germann, Alham Fikri Aji, Nikolay Bogoychev,  
403 André F. T. Martins, and Alexandra Birch. Marian: Fast neural machine translation in C++.  
404 In *Proceedings of ACL 2018, System Demonstrations*, pages 116–121, Melbourne, Australia,  
405 July 2018. Association for Computational Linguistics. doi: 10.18653/v1/P18-4020. URL  
406 <https://aclanthology.org/P18-4020>. 12
- 407 [5] Alex Krizhevsky, Geoffrey Hinton, et al. Learning multiple layers of features from tiny images.  
408 2009. 13
- 409 [6] Jens Lehmann, Robert Isele, Max Jakob, Anja Jentzsch, Dimitris Kontokostas, Pablo N Mendes,  
410 Sebastian Hellmann, Mohamed Morsey, Patrick Van Kleef, Sören Auer, et al. Dbpedia—a large-  
411 scale, multilingual knowledge base extracted from wikipedia. *Semantic web*, 6(2):167–195,  
412 2015. 13
- 413 [7] Andrew L. Maas, Raymond E. Daly, Peter T. Pham, Dan Huang, Andrew Y. Ng, and Christopher  
414 Potts. Learning word vectors for sentiment analysis. In *Proceedings of the 49th Annual Meeting*  
415 *of the Association for Computational Linguistics: Human Language Technologies*, pages 142–  
416 150, Portland, Oregon, USA, June 2011. Association for Computational Linguistics. URL  
417 <http://www.aclweb.org/anthology/P11-1015>. 13
- 418 [8] Harikrishna Narasimhan and Aditya K Menon. Training over-parameterized models with  
419 non-decomposable objectives. *Advances in Neural Information Processing Systems*, 34, 2021.  
420 3, 11, 15
- 421 [9] Giorgio Patrini, Alessandro Rozza, Aditya Krishna Menon, Richard Nock, and Lizhen Qu.  
422 Making deep neural networks robust to label noise: A loss correction approach. In *Proceedings*  
423 *of the IEEE conference on computer vision and pattern recognition*, pages 1944–1952, 2017. 3
- 424 [10] Olga Russakovsky, Jia Deng, Hao Su, Jonathan Krause, Sanjeev Satheesh, Sean Ma, Zhiheng  
425 Huang, Andrej Karpathy, Aditya Khosla, Michael Bernstein, et al. Imagenet large scale visual  
426 recognition challenge. *International journal of computer vision*, 115(3):211–252, 2015. 13
- 427 [11] Victor Sanh, Lysandre Debut, Julien Chaumond, and Thomas Wolf. Distilbert, a distilled version  
428 of bert: smaller, faster, cheaper and lighter. *arXiv preprint arXiv:1910.01108*, 2019. 9
- 429 [12] Kihyuk Sohn, David Berthelot, Nicholas Carlini, Zizhao Zhang, Han Zhang, Colin A Raff-  
430 fel, Ekin Dogus Cubuk, Alexey Kurakin, and Chun-Liang Li. Fixmatch: Simplifying semi-  
431 supervised learning with consistency and confidence. *Advances in Neural Information Process-*  
432 *ing Systems*, 33:596–608, 2020. 9, 12, 13
- 433 [13] Colin Wei and Tengyu Ma. Improved sample complexities for deep neural networks and robust  
434 classification via an all-layer margin. In *International Conference on Learning Representations*,  
435 2019. 7
- 436 [14] Colin Wei, Kendrick Shen, Yining Chen, and Tengyu Ma. Theoretical analysis of self-training  
437 with deep networks on unlabeled data. In *International Conference on Learning Representations*,  
438 2020. 2, 3, 4, 7, 8, 15, 16
- 439 [15] Thomas Wolf, Lysandre Debut, Victor Sanh, Julien Chaumond, Clement Delangue, Anthony  
440 Moi, Pierric Cistac, Tim Rault, Rémi Louf, Morgan Funtowicz, et al. Transformers: State-  
441 of-the-art natural language processing. In *Proceedings of the 2020 conference on empirical*  
442 *methods in natural language processing: system demonstrations*, pages 38–45, 2020. 9
